# Supplementary material
Source: PubMed Central journal article supplement (PMC2084321)

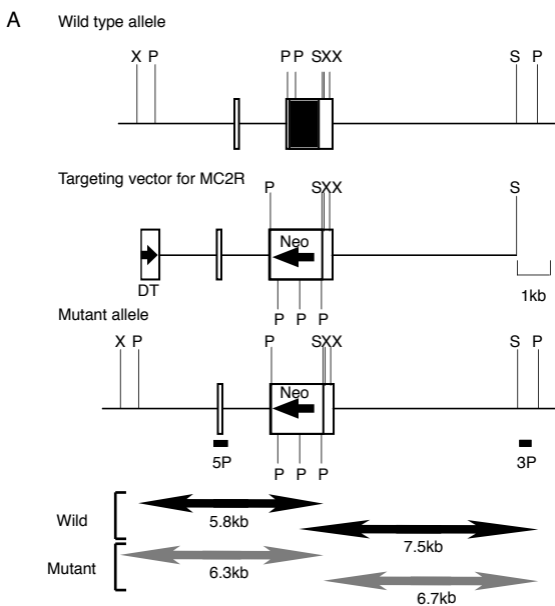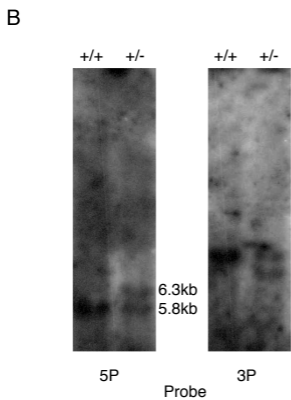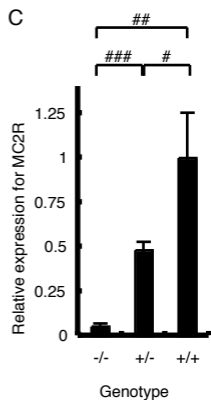

Supplement: pnas_0706953104_1.pdf [file pnas_0706953104_1.pdf]
